# Supplementary material
Source: ML conference proceedings conference paper supplement (https://openaccess.thecvf.com/content/CVPR2023/html/Chen_Activating_More_Pixels_CVPR_2023_paper.html)
Supplement: Supplementary file 1 [file Chen_Activating_More_Pixels_CVPR_2023_supplemental.pdf]

# Activating More Pixels in Image Super-Resolution Transformer

## Supplementary Material

Xiangyu Chen<sup>1,2,3</sup> Xintao Wang<sup>4</sup> Jiantao Zhou<sup>1</sup> Yu Qiao<sup>2,3</sup> Chao Dong<sup>2,3†</sup>

<sup>1</sup>State Key Laboratory of Internet of Things for Smart City, University of Macau

<sup>2</sup>Shenzhen Key Lab of Computer Vision and Pattern Recognition,  
Shenzhen Institute of Advanced Technology, Chinese Academy of Sciences

<sup>3</sup>Shanghai Artificial Intelligence Laboratory <sup>4</sup>ARC Lab, Tencent PCG

{chxy95, xintao.alpha}@gmail.com jtzhou@um.edu.mo {yu.qiao, chao.dong}@siat.ac.cn

### 1. Training Details

We use DF2K (DIV2K+Flicker2K) with 3450 images as the training dataset when training from scratch. The low-resolution images are generated from the ground truth images by the “bicubic” down-sampling in MATLAB. We set the input patch size to  $64 \times 64$  and use random rotation and horizontally flipping for data augmentation. The mini-batch size is set to 32 and total training iterations are set to 500K. The learning rate is initialized as  $2e-4$  and reduced by half at [250K,400K,450K,475K]. For  $\times 4$  SR, we initialize the model with pre-trained  $\times 2$  SR weights and halve the iterations for each learning rate decay as well as total iterations. We adopt Adam optimizer with  $\beta_1 = 0.9$  and  $\beta_2 = 0.99$  to train the model. For the same-task pre-training, the full ImageNet dataset with 1.28 million images is first exploited to pre-train the model for 800K iterations. The initial learning rate is also set to  $2e-4$  but reduced by half at [300K,500K,650K,700K,750k]. Then, we adopt DF2K dataset to fine-tune the pre-trained model. For fine-tuning, we set the initial learning rate to  $1e-5$  and halve it at [125K,200K,230K,240K] for total 250K training iterations.

### 2. Analysis of Model Complexity

We conduct experiments to analyze the computational complexity of our method from three aspects: window size for calculation of self-attention, overlapping cross-attention block (OCAB) and channel attention block (CAB). We also compare our method with the Transformer-based method SwinIR. The  $\times 4$  SR performance on Urban100 are reported and the number of Multiply-Add operations is counted at the input size of  $64 \times 64$ . Note that pre-training techniques (including  $\times 2$  pre-training) are **NOT** used for all the models in this section. The experimental setup is completely fair.

First, we use the standard Swin Transformer block as the backbone to explore the influence on different window

Table 1. Model complexity comparison of window sizes.

| window size | #Params. | #Multi-Adds. | PSNR    |
|-------------|----------|--------------|---------|
| (8, 8)      | 11.9M    | 53.6G        | 27.45dB |
| (16, 16)    | 12.1M    | 63.8G        | 27.81dB |

Table 2. Model complexity comparison of OCAB and CAB.

| Method   | #Params. | #Multi-Adds. | PSNR    |
|----------|----------|--------------|---------|
| Baseline | 12.1M    | 63.8G        | 27.81dB |
| w/ OCAB  | 13.7M    | 74.7G        | 27.91dB |
| w/ CAB   | 19.2M    | 92.8G        | 27.91dB |
| Ours     | 20.8M    | 103.7G       | 27.97dB |

Table 3. Model complexity comparison of CAB sizes.

| $\beta$ in CAB | #Params. | #Multi-Adds. | PSNR    |
|----------------|----------|--------------|---------|
| 1              | 33.2M    | 150.1G       | 27.97dB |
| 2              | 22.7M    | 107.1G       | 27.92dB |
| 3 (default)    | 19.2M    | 92.8G        | 27.91dB |
| 6              | 15.7M    | 78.5G        | 27.88dB |
| w/o CAB        | 12.1M    | 63.8G        | 27.81dB |

Table 4. Model complexity comparison of SwinIR and HAT.

| Method       | #Params. | #Multi-Adds. | PSNR    |
|--------------|----------|--------------|---------|
| SwinIR       | 11.9M    | 53.6G        | 27.45dB |
| HAT-S (ours) | 9.6M     | 54.9G        | 27.80dB |
| SwinIR-L1    | 24.0M    | 104.4G       | 27.53dB |
| SwinIR-L2    | 23.1M    | 102.4G       | 27.58dB |
| HAT (ours)   | 20.8M    | 103.7G       | 27.97dB |

sizes. As shown in Tab. 1, enlarging window size can bring a large performance gain (+0.36dB) with a little increase in parameters and  $\sim 19\%$  increase in Multi-Adds.

Then, we use window size 16 as the baseline to investigate the computational complexity of the proposed OCAB and CAB. As illustrated in Tab. 2, our OCAB obtains a performance gain with a limited increase of parameters and Multi-Adds. It demonstrates that the effectiveness and efficiency of the proposed OCAB. Besides, adding CAB to the

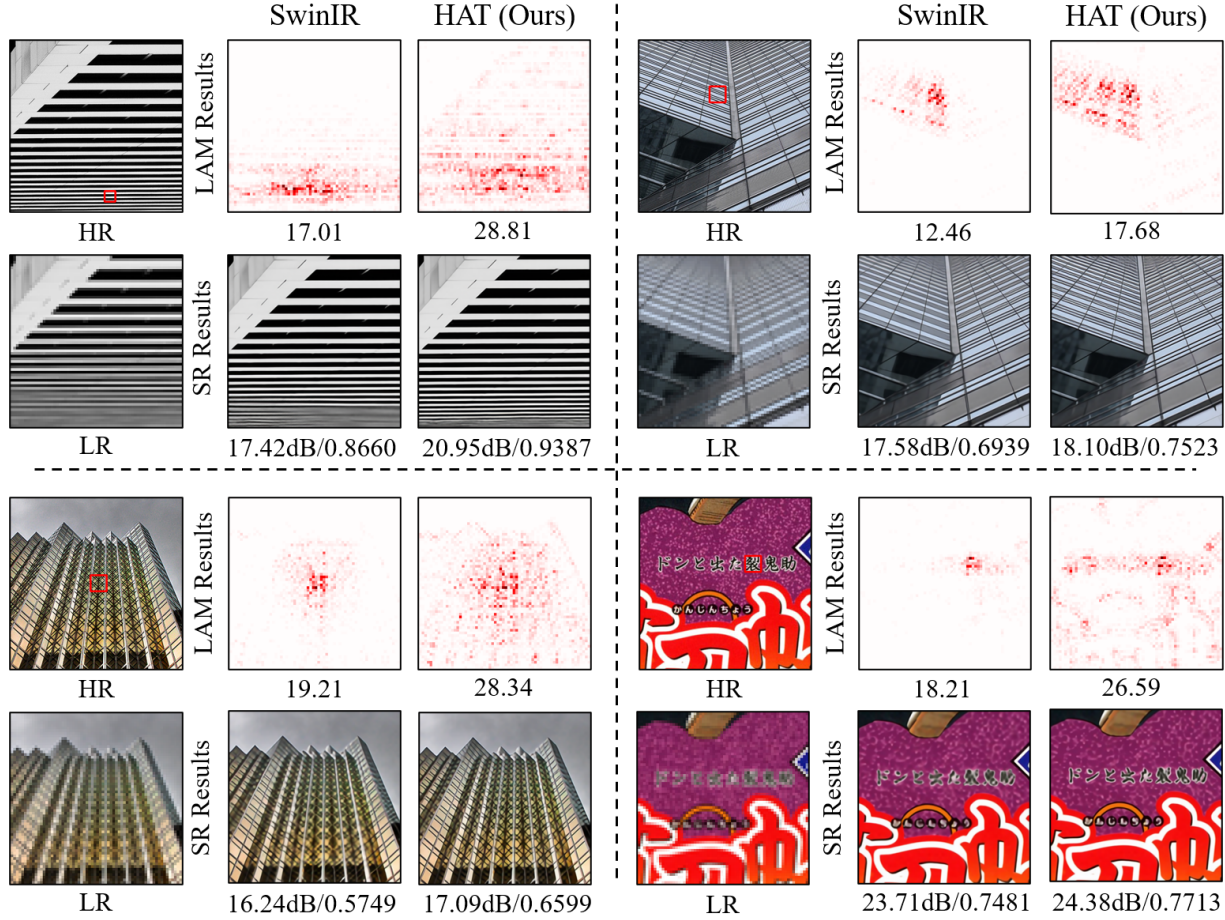

Figure 1. Comparison of LAM results between SwinIR and HAT.

baseline model also achieves better performance.

Since CAB seems to be computationally expensive, we further explore the influence on CAB sizes by modulating the squeeze factor  $\beta$  (mentioned in Sec.3.2.2 in the main paper). As shown in Tab. 3, adding a small CAB whose  $\beta$  equals 6 can bring considerable performance improvement. When we continuously reduce  $\beta$ , the performance increases but with larger model sizes. To balance the performance and computations, we set  $\beta$  to 3 as the default setting.

Furthermore, we compare HAT and SwinIR with the similar numbers of parameters and Multi-Adds in two settings, as presented in Tab. 4. 1) We compare HAT-S with the original version of SwinIR. With less parameters and comparable computations, HAT-S significantly outperforms SwinIR. 2) We enlarge SwinIR by increasing the width and depth of SwinIR to achieve similar computations as HAT, denoted as SwinIR-L1 and SwinIR-L2. HAT achieves the best performance at the lowest computational cost.

Overall, we find that enlarging the window size for the calculation of self-attention is a very cost-effective way to improve the Transformer model. Moreover, the proposed OCAB can bring an obvious performance gain with limited

increase of computations. Although CAB is not as efficient as above two schemes, it can also bring stable and considerable performance improvement. Benefiting from the three designs, HAT can substantially outperforms the state-of-the-art method SwinIR with comparable computations.

### 3. More Visual Comparisons with LAM

We provide more visual comparisons with LAM results to compare SwinIR and our HAT. The red points in LAM results represent the used pixels for reconstructing the patch marked with a red box in the HR image, and Diffusion Index (DI) is computed to reflect the range of involved pixels. The more pixels are utilized to recover the specific input patch, the wider the distribution of red points is in LAM and the higher DI is. As shown in Fig. 1, the LAM attribution of HAT expands to the almost full image, while that of SwinIR only gathers in a limited range. For the quantitative metric, HAT also obtains a much higher DI value than SwinIR. All these results demonstrate that our method activates more pixels to reconstruct the low-resolution input image. As a result, SR results generated by our method have higher PSNR/SSIM and better visual quality.
